# Supplementary material for: The interaction of Escherichia coli O157 :H7 and Salmonella Typhimurium flagella with host cell membranes and cytoskeletal components
Source: PubMed Central journal article supplement (PMC7660914; doi:10.1099/mic.0.000959), 2020-09-04
Supplement: mic-166-947-s001.pdf [file mic-166-947-s001.pdf]

## Supplementary Information

**Figure S1. Confocal microscopy of intracellular interactions of H7 flagella with host cells.** Confocal z-slices of *E. coli* O157:H7 TUV93-0 flagella (green) interacting with actin (red). Nuclei staining is cyan. **(A1)** XY projection of TUV93-0 interacting with EBL cells, 3 h post infection. The micro-colony indicated with an arrow shows an H7 flagellum curling round A/E lesions. The labelled inset marks the XZ and YZ projections analysed in B1-B2. **(B1-B2)** Arrows point to specific regions within individual XZ **(B1)** and YZ **(B2)** slices in which H7 flagellum is inside a region of actin staining. **(C1)** Top panel shows an XY projection of the whole field from which the images in Fig. 1A were taken. Middle panels show Fig. 1A XZ and YZ projections, free of actin/flagellum co-incidence labelling. Lower panels show actin-H7 flagellum co-incidence (yellow) across individual z-slices in XZ and YZ planes. Scale bars = 5  $\mu$ m.

*(Figure on next page)*

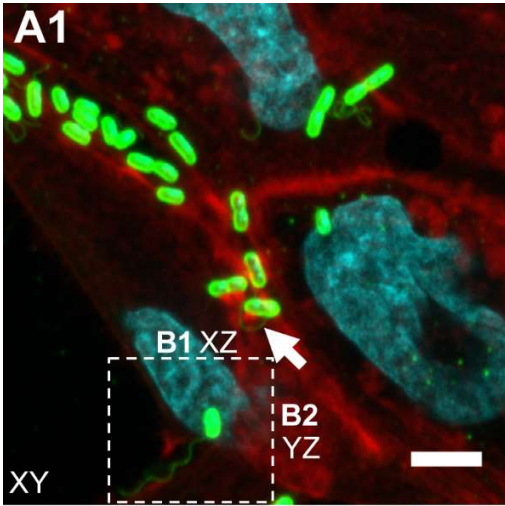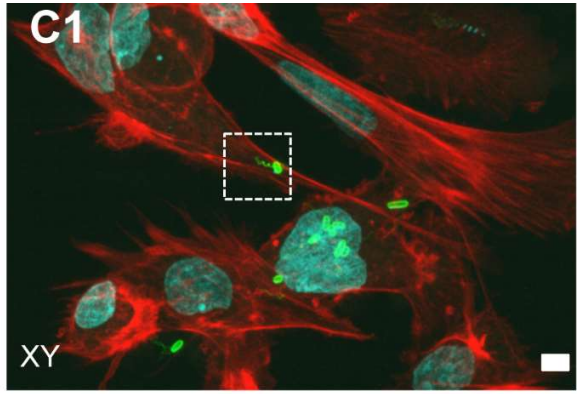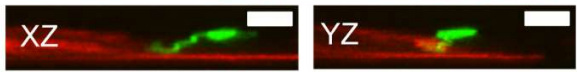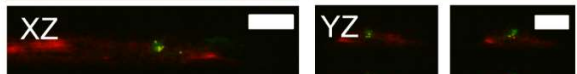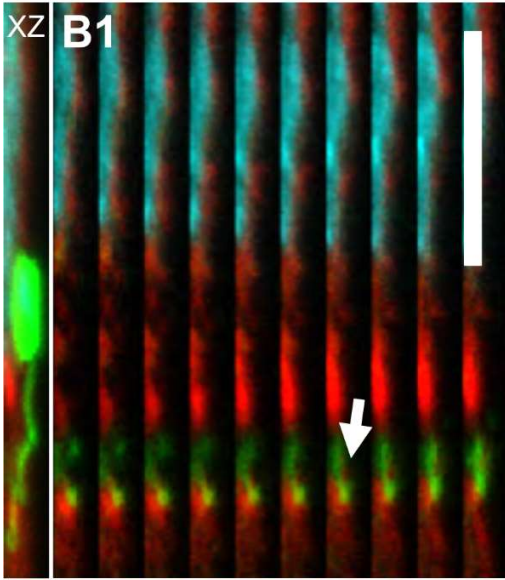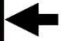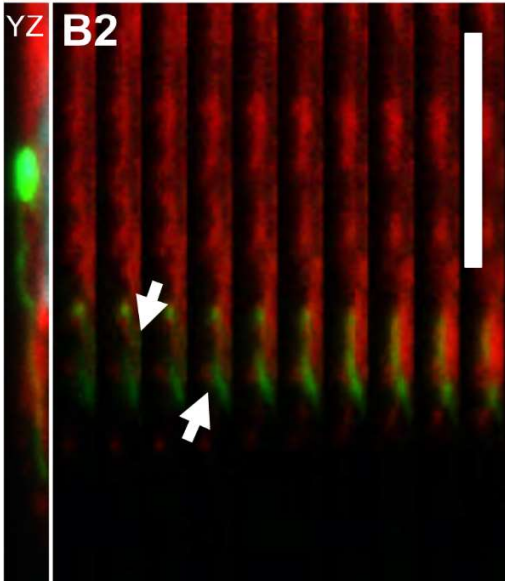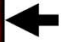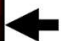

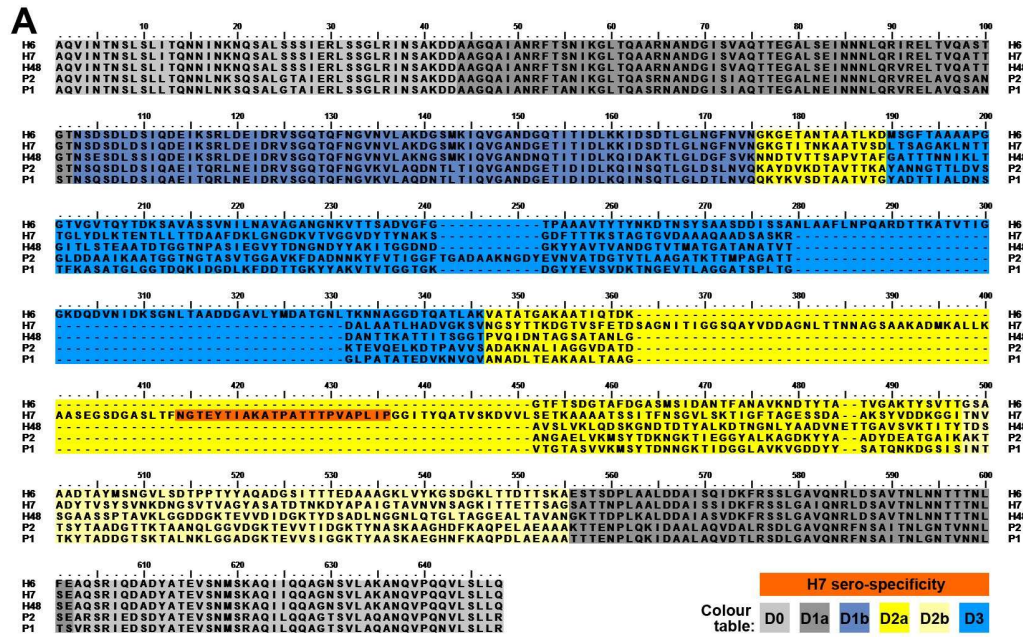

**B**

**H6 insertion: 52aa**  
 NLAAFLNPQARDTTTKATVTIGGKQD  
 DVNIDKSGNLTAAADDGAVLYMDATG  
 NL

**H7 insertion: 89aa**  
 SAGNITIGGSQAYVDDAGNLTNNA  
 GSAAKADMKALLKAAASEGSDGASLT  
 FNGTEYTIKATPATTPVAPLI  
 GITVQATVSKDVVL

**H48 insertion: 2aa**  
 ET

**P2 insertion: 11aa**  
 TGADAAKNGDY

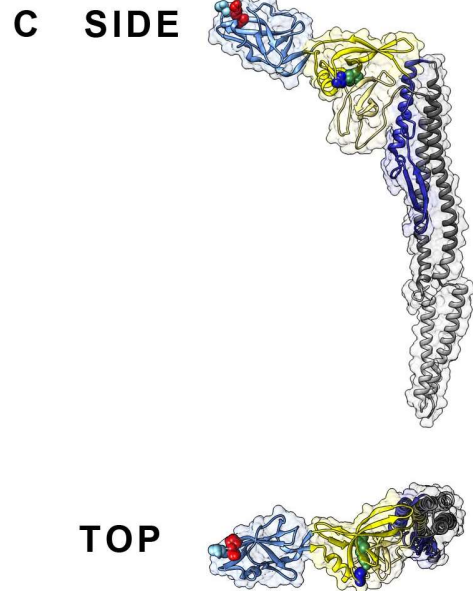

**Figure S2. Protein sequence and structural differences between H6, H7, H48, P1 and P2 flagellins.** (A) Pairwise structural alignments with P1 flagellin (PDB: 1UCU) were generated using the FFAS03 server from its PDB database. Alignments were then stitched together and presented in BioEdit v 7.2.0. Amino acids are coloured by structural domain, as defined by Yonekura *et al.*<sup>1</sup> and outlined in the colour table. This model is partially validated by the presence of the H7-serospecific region in the H7-specific structural insertion<sup>2</sup>, (orange). (B) Amino acid sequences modelled to be structurally dissimilar to the P1 structural template, as determined by the alignment in (A). (C) Location of structural insertions in P1 flagellin indicated by spherically presented side-chains, colour-coded as in (B). The P1 structural model is presented coloured by structural domain as in (A), with top and side views, in USCF Chimera v 1.8<sup>3</sup>.

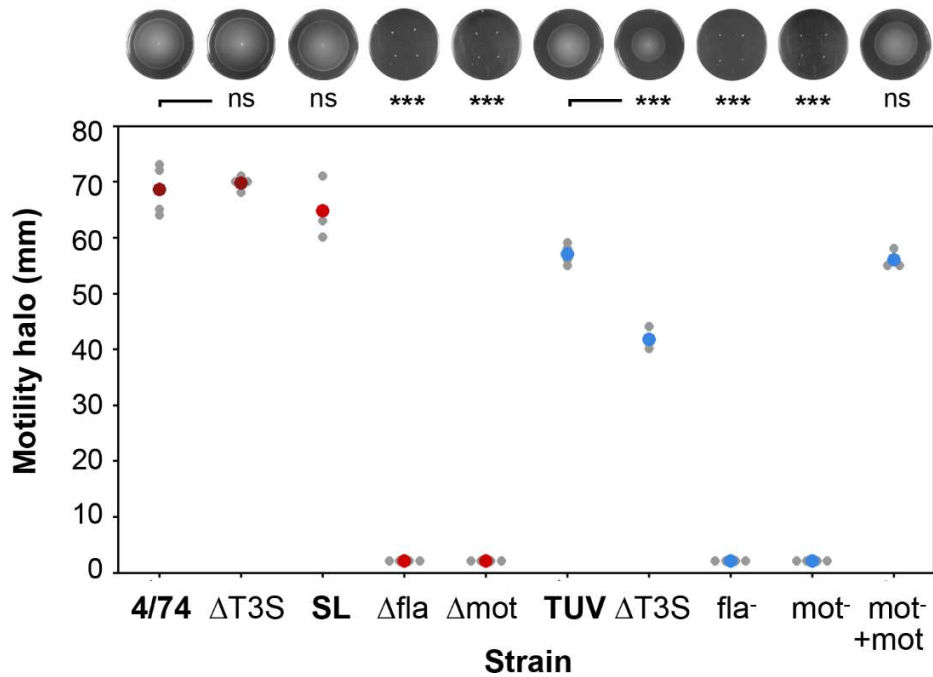

**Figure S3. Motility *S. Typhimurium* and *E. coli* O157:H7 strains used in haemolysis assays.** Motility of strains used in Fig. 6 was measured by the radius of growth after inoculation into 0.3% (w/v) LB agar at RT for 36 h. SL= SL1344. The top panel shows representative motility plates, and the bottom panel shows radii measurements from point of inoculation of four biological replicates. Statistical analyses of these are presented as 2-tailed homoscedastic students T-tests ( $p \leq 0.0001 = ***$ ) against WT (4/74 or TUV93-0).

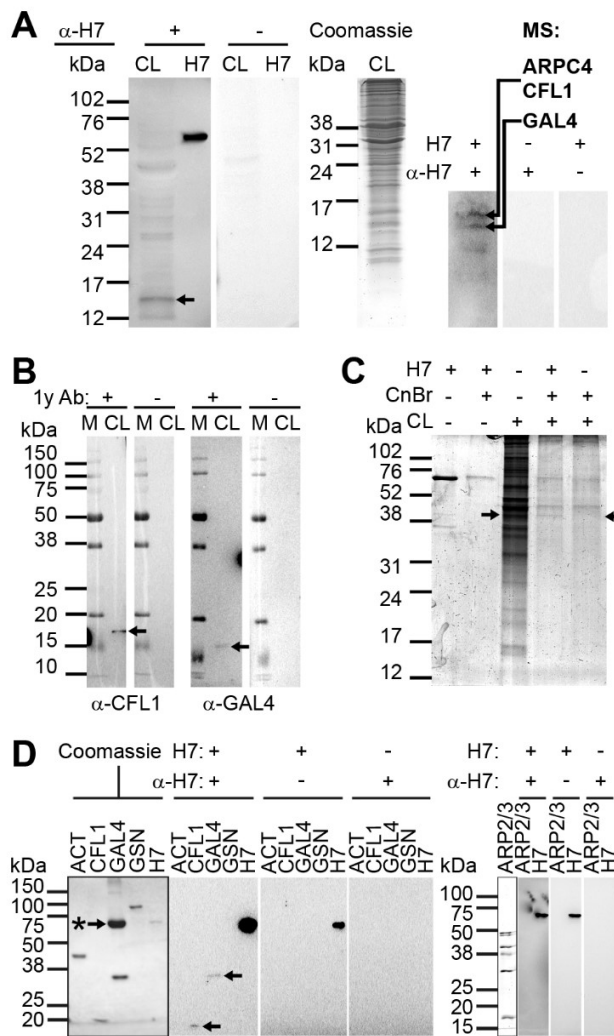

### Figure S4. Binding substrates for H7 flagella present in bovine terminal rectum epithelial lysates.

**(A)** Far-Western blot of primary bovine rectal epithelial cell lysates (CL) probed with H7 flagella and H7-specific antibodies. Left-hand blots show one reacting band (arrow) resolved further (right) and the bands indicated were identified as Arp2/3 complex sub-unit 4 (ARPC4), cofilin-1 (CFL1) and galectin-4 (GAL4) by mass-spectrometry (MS). **(B)** Western-blots of primary bovine rectal epithelial cell lysates (CL) confirmed the presence of CFL1 and GAL4 between 15-20 kDa with  $\alpha$ -CFL1 and  $\alpha$ -GAL4 antibodies (arrows, Table S3). The size discrepancy of GAL4 can be explained by its degradation or processing within cell lysates, as has been observed previously<sup>4,5</sup>. **(C)** Pull-down of bovine  $\beta$ -actin from primary bovine rectal epithelial cell lysates (CL) by H7 flagella cross-linked to CnBr-activated Sepharose beads. The cell lysates were prepared by freeze-thawing. Pre-cleared empty beads were used as a negative control (final lane). Arrows indicate 38-50 kDa protein bands in the coomassie-stained gel that were excised and identified as  $\beta$ -Actin (ACTB1) by MS. **(D)** Far-Western blots of 1  $\mu$ g purified human  $\beta\gamma$ -actin (ACT), recombinant human CFL1, recombinant human GAL4 and purified gelsolin (GSN) from bovine plasma with

negative control blots on the left, and 1  $\mu$ g purified ARPC4 from bovine brain with detection controls on the right, probed with H7 flagella and H7-specific antibodies as indicated. The ~60 kDa band indicated with an arrow marked with an (\*) is 0.1% (w/v) BSA, a carrier protein for GAL4. 0.5  $\mu$ g H7 was loaded as a positive detection control. Detected bands are indicated with arrows. Marker lane (M) sizes are in kDa on the left throughout.

**Movie S1. Co-localisation of *E. coli* O157:H7 flagella with phalloidin on a bovine terminal rectal epithelial cell.** A rotating three-dimensional projection of a confocal micrograph that has captured *E. coli* O157:H7 (green) flagella coincident with bovine primary rectal epithelial actin (red, Fig. 1A). Coincident staining of actin and O157:H7 is shown in yellow. The 3D projection was made and presented using NIH ImageJ software.

**Movie S2. Tomographic slice of the flagellated *S. Typhimurium* within an epithelial cell.** A view up and down through the 3D projection of the tomographic slice shown in figure 5A1, zooming in to the inset shown in figure 5A2. An anisotropic diffusion filter was applied to reduce noise.

**Movie S3. Tomographic slice of the flagellated *S. Typhimurium* inside a membrane ruffle.** A view up and down through the 3D projection of the tomographic slice shown in figure 5B1, zooming in to the inset shown in figure 5B2. An anisotropic diffusion filter was applied to reduce noise.

**Movie S4. Tomographic slice of the flagellated *S. Typhimurium* at the point of induced uptake into an epithelial cell shown in figure 5C.** A view up and down through the 3D projection of the tomographic slice shown in figure 5C1, with segmentation analysis of host cell membranes shown in red, zooming in to the inset shown in figure 5C2. An anisotropic diffusion filter was applied to reduce noise.

**Table S1. Plasmids used or constructed in this study.**

| Plasmid          | Relevant features                                                                                   | Source     |
|------------------|-----------------------------------------------------------------------------------------------------|------------|
| pAJR145          | Amp <sup>r</sup> , constitutively expressed <i>egfp</i>                                             | 6          |
| pIB307           | Chl <sup>r</sup> , Kan <sup>r</sup> , T <sup>o</sup> C <sup>s</sup> replication (28°C), single copy | 7          |
| pTOF25           | Chl <sup>r</sup> , Kan <sup>r</sup> , T <sup>o</sup> C <sup>s</sup> replication (28°C), single copy | 8          |
| pEBW6            | pIB307; H7downB flank; H6 CDS; H7up flank                                                           | This study |
| pEBW7            | pIB307; H7downB flank; H7 CDS; H7up flank                                                           | This study |
| pEBW5            | pWSK29 <i>fliC<sub>H48</sub></i> from <i>E. coli</i> K-12 MG1655                                    | 9          |
| pTOF <i>motA</i> | pTOF25; <i>motA</i> N flank; Kan <sup>r</sup> ; <i>motA</i> C flank                                 | This study |

**Table S2. Primer pairs used in this study. Annealing temperatures used indicated in bold.**

| Product       | Primer Name     | Primer Sequence                                           | Source                                                      |
|---------------|-----------------|-----------------------------------------------------------|-------------------------------------------------------------|
| H7up flank    | 5'H7upF.SacI    | <u>AAGAGCTCTATTGCCTGTGCCACTTCAC</u>                       | 9                                                           |
|               | <b>55°C</b>     | 3'H7upR.BamHI                                             | <u>AAGGATCC</u> TAAGTACTGAGACTGACGGCAAC                     |
| H7downB flank | H7downF3.BamHI  | <u>GGGGATCCCACCCGTCGGCTCAATCG</u>                         | This study                                                  |
|               | <b>55°C</b>     | 3'H7downR.Sall                                            | <u>AAGTCGACTT</u> CGTATCGTCTCTGGTGGT                        |
| H7 CDS        | 3'NtH7F2.BamHI  | <u>GGGGATCCCAATACGTAATCAACGACTTGC</u>                     | This study                                                  |
|               | <b>58°C</b>     | 5'CtH7R.BamHI                                             | <u>AAGGATCC</u> TTAACCTGCAGCAGAGACAG                        |
| H6 CDS        | 3'NtH6F2.BamHI  | <u>GGGGATCCC</u> AAAACGTAATCAACGACTTGC                    | 10                                                          |
|               | <b>58°C</b>     | JTH11fliC.R.BamHI                                         | <u>CCGGATCC</u> CTAACCTGCAGCAGAGACAG                        |
| <i>sacB</i>   | SacB 5'         | GCAACTCAAGCGTTTGCGAAA                                     | 11                                                          |
|               | <b>55°C</b>     | SacB 3'                                                   | GGCTTGTATGGGCCAGTTAAG                                       |
| O157 specific | O157F           | CGGACATCCATGTGATATGG                                      | 12                                                          |
|               | <b>55°C</b>     | O157R                                                     | TTGCCTATGTACAGCTAACC                                        |
| pIB307 insert | pIB073-screen.F | CCTGTCCTACGAGTTGCATG                                      | 13                                                          |
|               | <b>60°C</b>     | pIB073-screen.R                                           | GACTCCTGCATTAGGAAGCA                                        |
| FliC locus    | 5'H7upF.SacI    | <u>AAGAGCTCTATTGCCTGTGCCACTTCAC</u>                       | This study                                                  |
|               | <b>55°C</b>     | 3'H7downR.Sall                                            | <u>AAGTCGACTT</u> CGTATCGTCTCTGGTGGT                        |
| MotA N flank  | No-motA         | <u>TTGCTGGTCTCGGTACCCGGG</u><br>CGACAACATTAGCGGCACTGACTC  | This study                                                  |
|               | <b>50°C</b>     | Ni-motA                                                   | <u>CGCTCTTGCGGCCGCTTGGAACGG</u><br>GACATCATCCTTCCACTGTTGACC |
| MotA C flank  | Co-motA         | <u>TCCCATTCGCCACCGGTCGAC</u><br>CACGCTGTCACCTCGGTTCCGGCTG | This study                                                  |
|               | <b>50°C</b>     | Ci-MotA                                                   | <u>CCGTTCCAAGCGGCCGCAAGAGCG</u><br>ATGTGCGTGCGGTGAAAAATCCGC |

**Table S3. Antibodies and stains used in this study.**

| <b>Primary Antibody</b>         | <b>Details</b>        | <b>Source</b>                               |
|---------------------------------|-----------------------|---------------------------------------------|
| α-H6                            | polyclonal rabbit IgG | Mast Assure                                 |
| α-H7                            | polyclonal rabbit IgG | Mast Assure                                 |
| α-FliC (P1)                     | polyclonal rabbit IgG | Ariel Blocker Lab,<br>University of Bristol |
| α-Hi (P1)                       | polyclonal rabbit IgG | Mast Assure                                 |
| α-H2 (P2)                       | polyclonal rabbit IgG | Difco                                       |
| α-P1+P2                         | polyclonal rabbit IgG | Difco                                       |
| α-O157:H7                       | polyclonal rabbit IgG | Mast Assure                                 |
| α-O157                          | monoclonal mouse IgG  | Abcam                                       |
| α-O4                            | polyclonal rabbit IgG | Mast Assure                                 |
| α-cofilin-1                     | monoclonal mouse IgG  | AbDSeroTec                                  |
| α-galectin-4                    | polyclonal goat IgG   | R&D                                         |
| <b>Secondary Antibody</b>       | <b>Details</b>        | <b>Source</b>                               |
| α-rabbit IgG-HRP                | polyclonal goat IgG   | R&D                                         |
| α-goat IgG-HRP                  | polyclonal rabbit IgG | R&D                                         |
| α-mouse IgG-HRP                 | polyclonal donkey IgG | R&D                                         |
| α-rabbit IgG-FITC               | polyclonal goat IgG   | Sigma                                       |
| α-rabbit IgG-FITC               | polyclonal goat IgG   | R&D                                         |
| α-rabbit IgG-10nm gold          | polyclonal goat IgG   | British Biocell Intl.                       |
| α-rabbit IgG- AlexaFluor568     | polyclonal goat IgG   | Molecular probes                            |
| α-mouse IgG- AlexaFluor568      | polyclonal goat IgG   | Molecular probes                            |
| α-rabbit IgG- AlexaFluor594     | polyclonal goat IgG   | Molecular probes                            |
| <b>Stains</b>                   |                       | <b>Source</b>                               |
| Phalloidin-Texas Red            |                       | Invitrogen                                  |
| Phalloidin-AlexaFluor588        |                       | Molecular Probes                            |
| Phalloidin-AlexaFluor647        |                       | Invitrogen                                  |
| Phalloidin-FITC                 |                       | Molecular Probes                            |
| Phalloidin-TRITC                |                       | Sigma                                       |
| DAPI                            |                       | Merck                                       |
| Wheat-germ agglutinin-Texas Red |                       | Invitrogen                                  |

**Supplementary references**

1. **Yonekura, K., Maki-Yonekura, S. & Namba, K.** Complete atomic model of the bacterial flagellar filament by electron cryomicroscopy. *Nature* **424**, 643–650 (2003).
2. **Kwang, J., Wilson, R., Yang, S. & He, Y.** Mapping of the H7-Serospecific Domain of *Escherichia coli* Flagellin. *CLINICAL AND DIAGNOSTIC LABORATORY IMMUNOLOGY* **3**, (1996).
3. **Pettersen, E. F. et al.** UCSF Chimera--a visualization system for exploratory research and analysis. *J. Comput. Chem.* **25**, 1605–12 (2004).
4. **Leffler, H., Masiarz, F. R. & Barondes, S. H.** Soluble lactose-binding vertebrate lectins: a growing family. *Biochemistry* **28**, 9222–9229 (1989).
5. **Oda, Y. et al.** Soluble lactose-binding lectin from rat intestine with two different carbohydrate-binding domains in the same peptide chain. *J. Biol. Chem.* **268**, 5929–5939 (1993).



6. **Roe, A. J. et al.** Co-ordinate single-cell expression of LEE4- and LEE5-encoded proteins of *Escherichia coli* O157:H7. *Mol. Microbiol.* **54**, 337–352 (2004).
7. **Blomfield, I. C., Vaughn, V., Rest, R. F. & Eisenstein, B. I.** Allelic exchange in *Escherichia coli* using the *Bacillus subtilis* *sacB* gene and a temperature-sensitive pSC101 replicon. *Mol. Microbiol.* **5**, 1447–1457 (1991).
8. **Merlin, C., McAteer, S. & Masters, M.** Tools for characterization of *Escherichia coli* genes of unknown function. *J. Bacteriol.* **184**, 4573–81 (2002).
9. **Rossez, Y. et al.** Flagella interact with ionic plant lipids to mediate adherence of pathogenic *Escherichia coli* to fresh produce plants. *Environ. Microbiol.* **16**, (2014).
10. **Mahajan, A. et al.** An investigation of the expression and adhesin function of H7 flagella in the interaction of *Escherichia coli* O157: H7 with bovine intestinal epithelium. *Cell. Microbiol.* **11**, 121–137 (2009).
11. **Xu, X. et al.** Lysogeny with Shiga Toxin 2-Encoding Bacteriophages Represses Type III Secretion in Enterohemorrhagic *Escherichia coli*. *PLoS Pathog.* **8**, e1002672 (2012).
12. **Paton, A. W. & Paton, J. C.** Detection and characterization of shiga toxigenic *Escherichia coli* by using multiplex PCR assays for *stx1*, *stx2*, *eaeA*, enterohemorrhagic *E. coli* *hlyA*, *rfb*(O111), and *rfb*(O157). *J. Clin. Microbiol.* (1998).
13. **Flockhart, A. F. et al.** Identification of a novel prophage regulator in *Escherichia coli* controlling the expression of type III secretion. *Mol. Microbiol.* **83**, 208–223 (2012).
